# Supplementary figures and images for: Conjugation-length dependence of regioregular oligo 3-alkyl(thienylene-vinylene)s demonstrates polyene-like behaviour with weak electron–electron correlations
Source: Royal Society of Chemistry journal article supplement (doi:10.1039/d3cp00362k), 2023-01-01

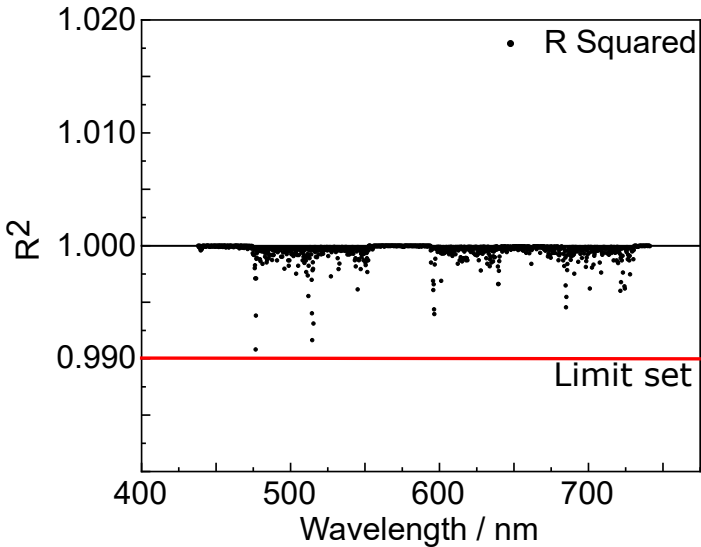

Supplement: d3cp00362k10.pdf [file d3cp00362k10.pdf]

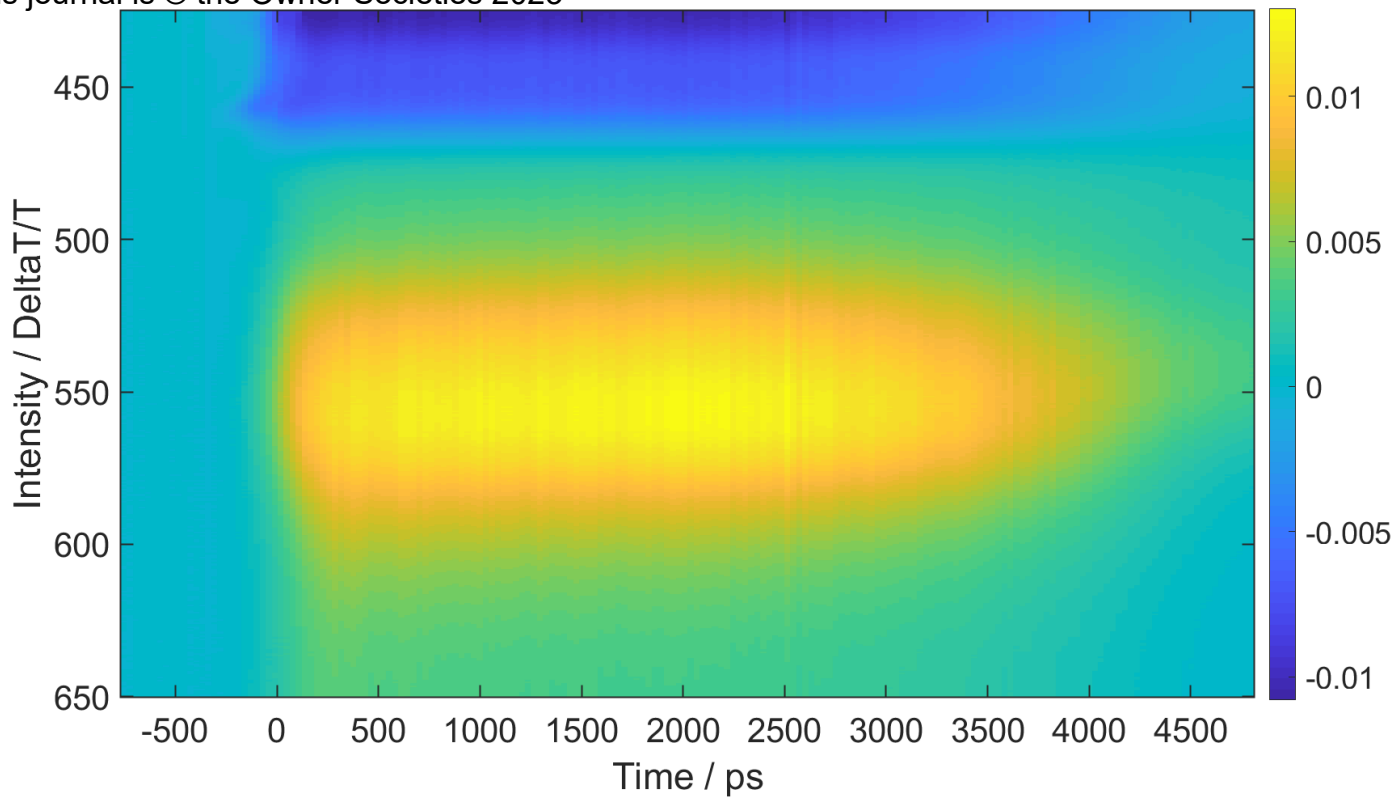

Supplement: d3cp00362k11.pdf [file d3cp00362k11.pdf]

a

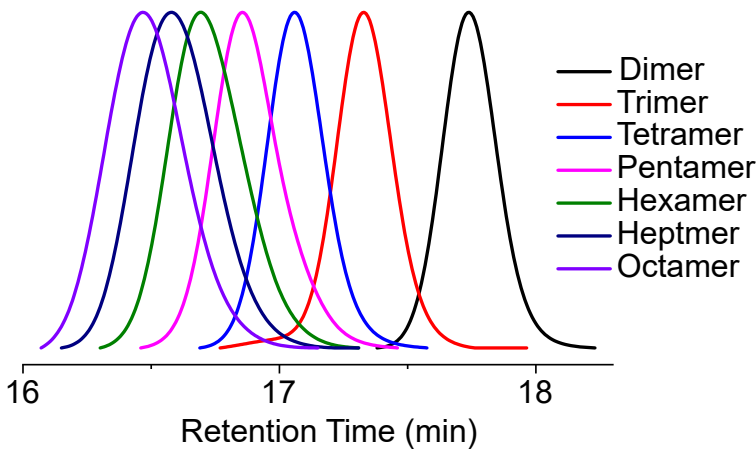

b

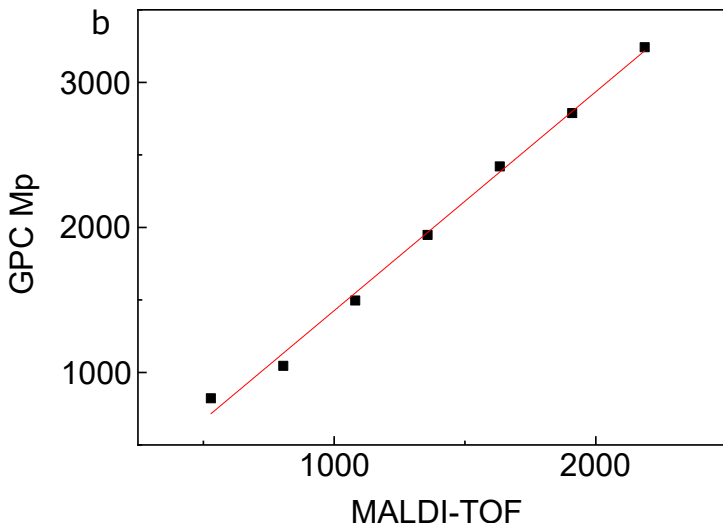

Supplement: d3cp00362k12.pdf [file d3cp00362k12.pdf]

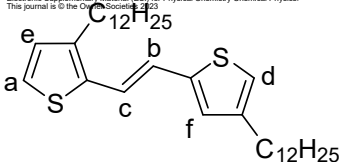

Supplement: d3cp00362k13.pdf [file d3cp00362k13.pdf]

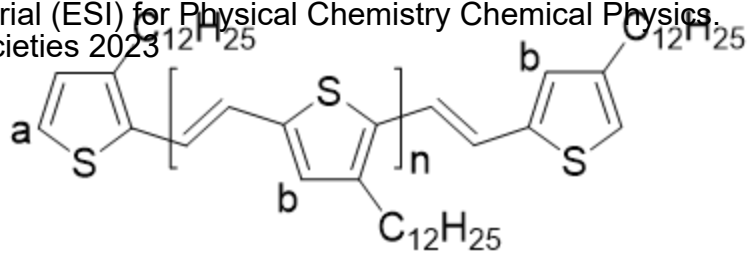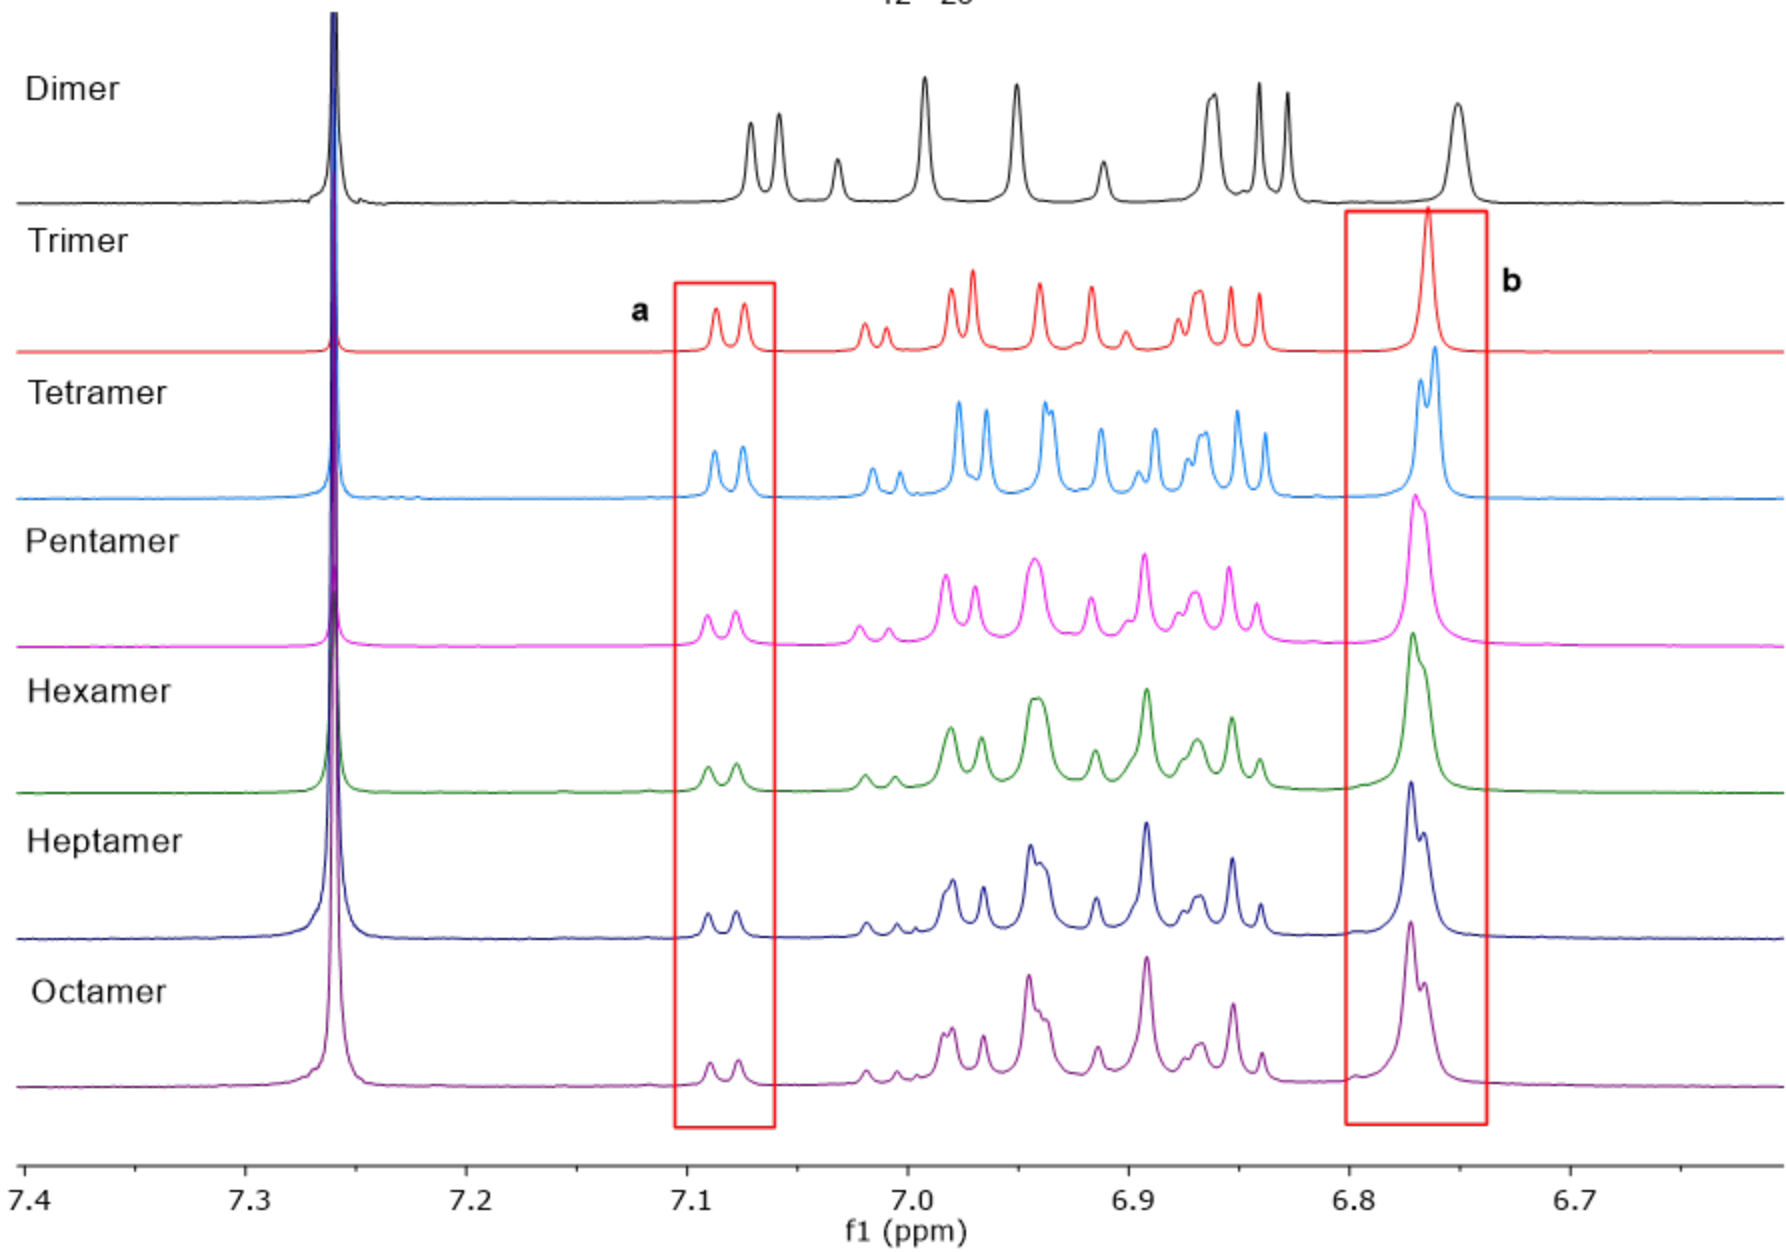

Supplement: d3cp00362k14.pdf [file d3cp00362k14.pdf]

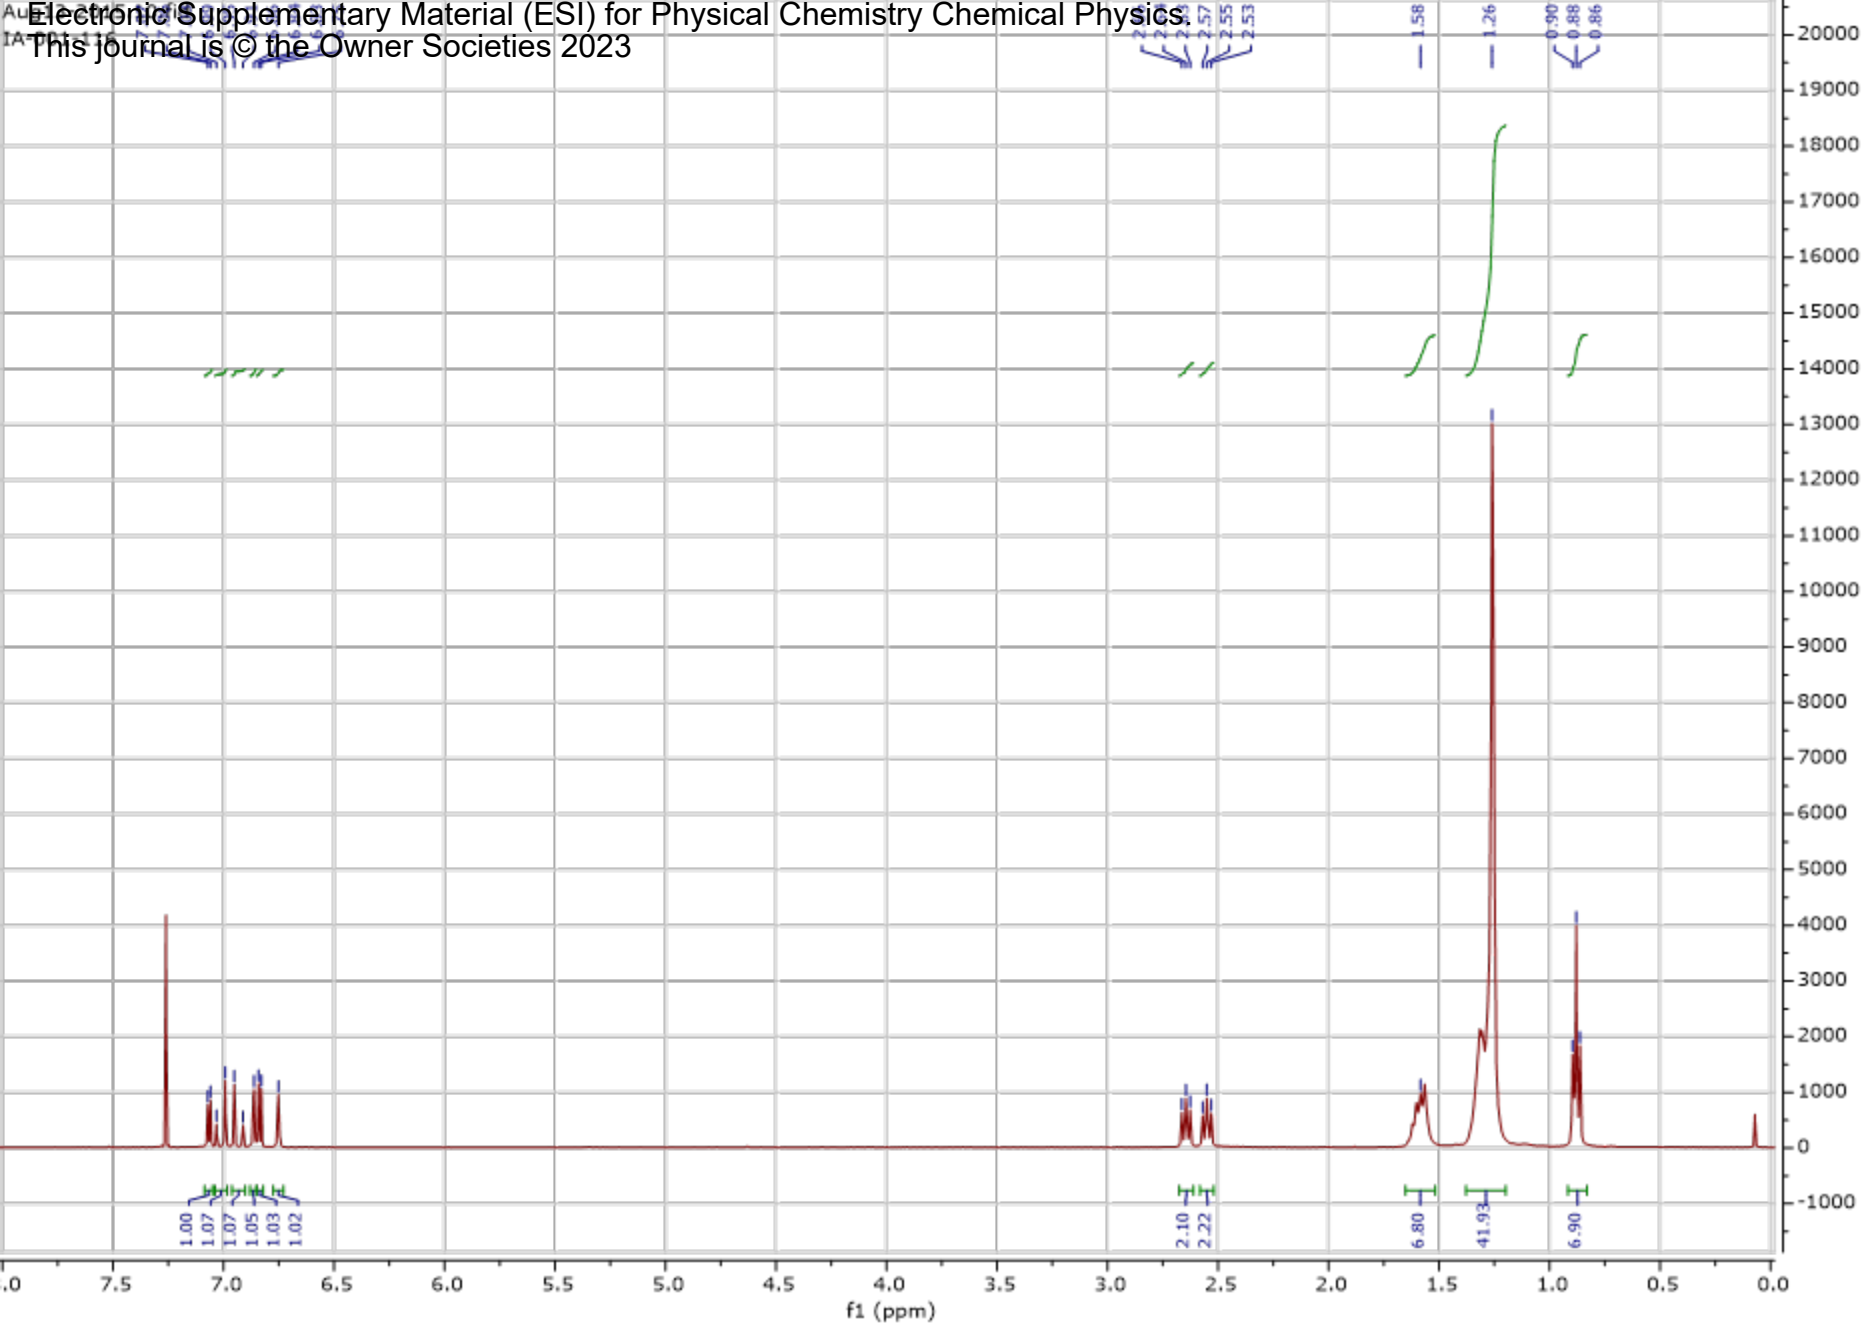

Supplement: d3cp00362k15.pdf [file d3cp00362k15.pdf]

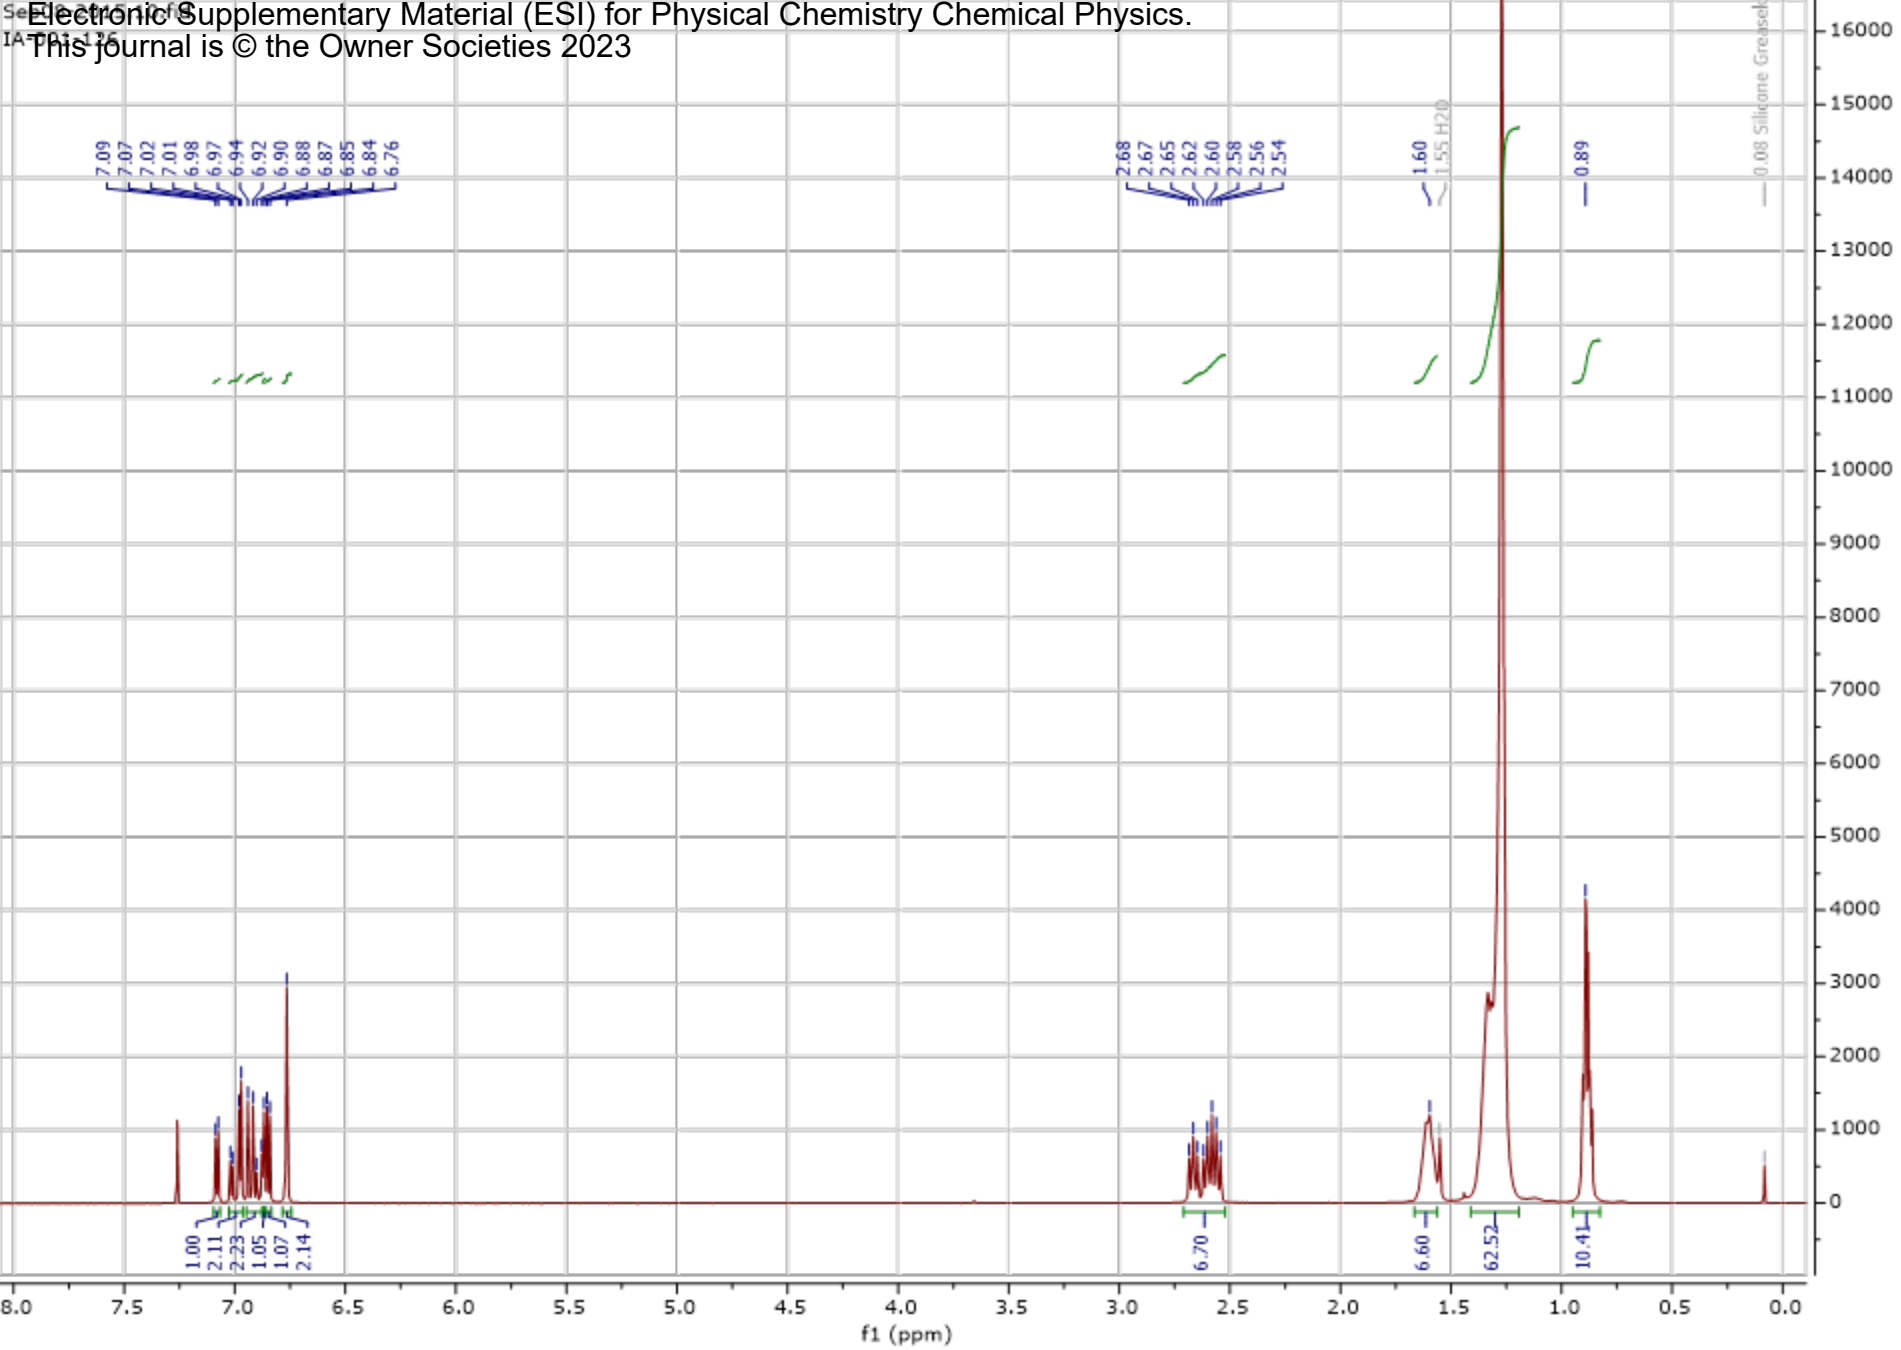

Supplement: d3cp00362k16.pdf [file d3cp00362k16.pdf]

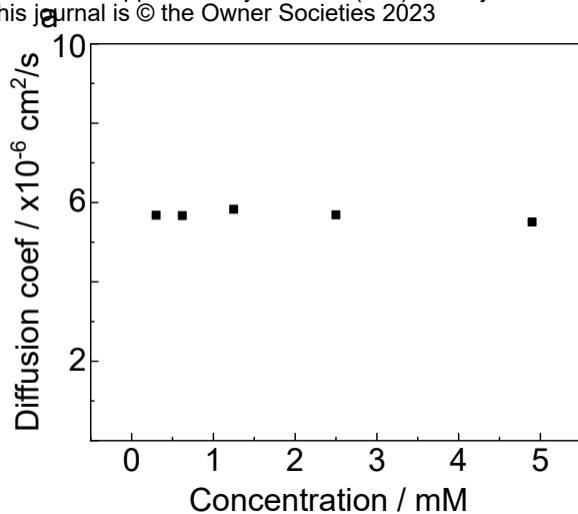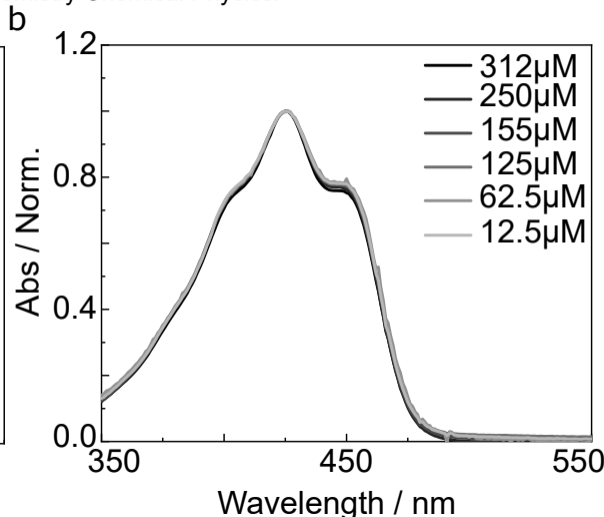

Supplement: d3cp00362k2.pdf [file d3cp00362k2.pdf]

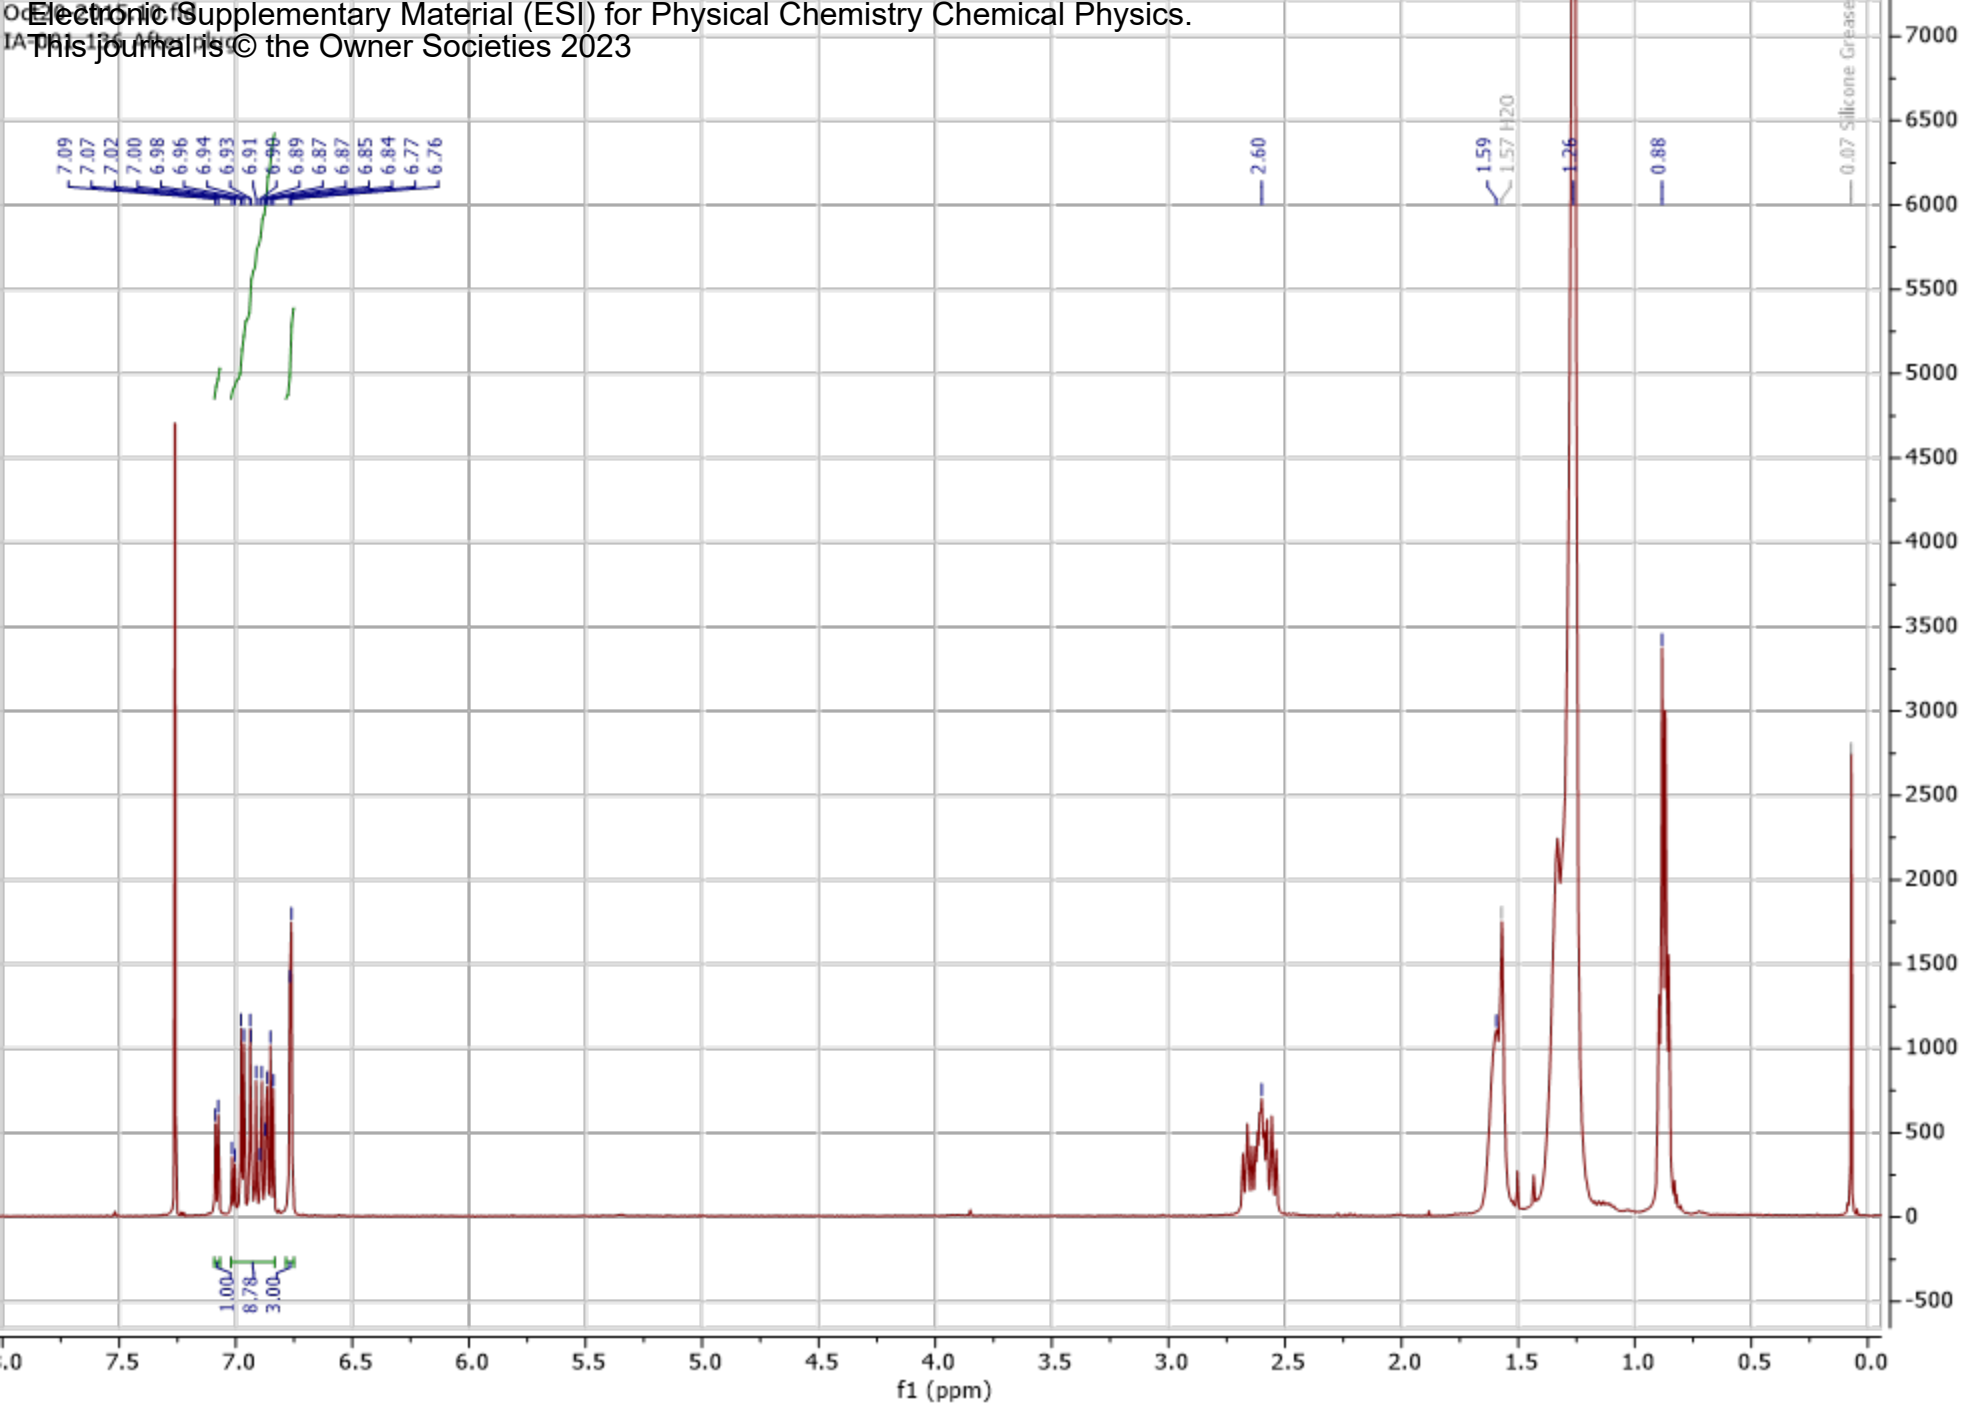

Supplement: d3cp00362k3.pdf [file d3cp00362k3.pdf]

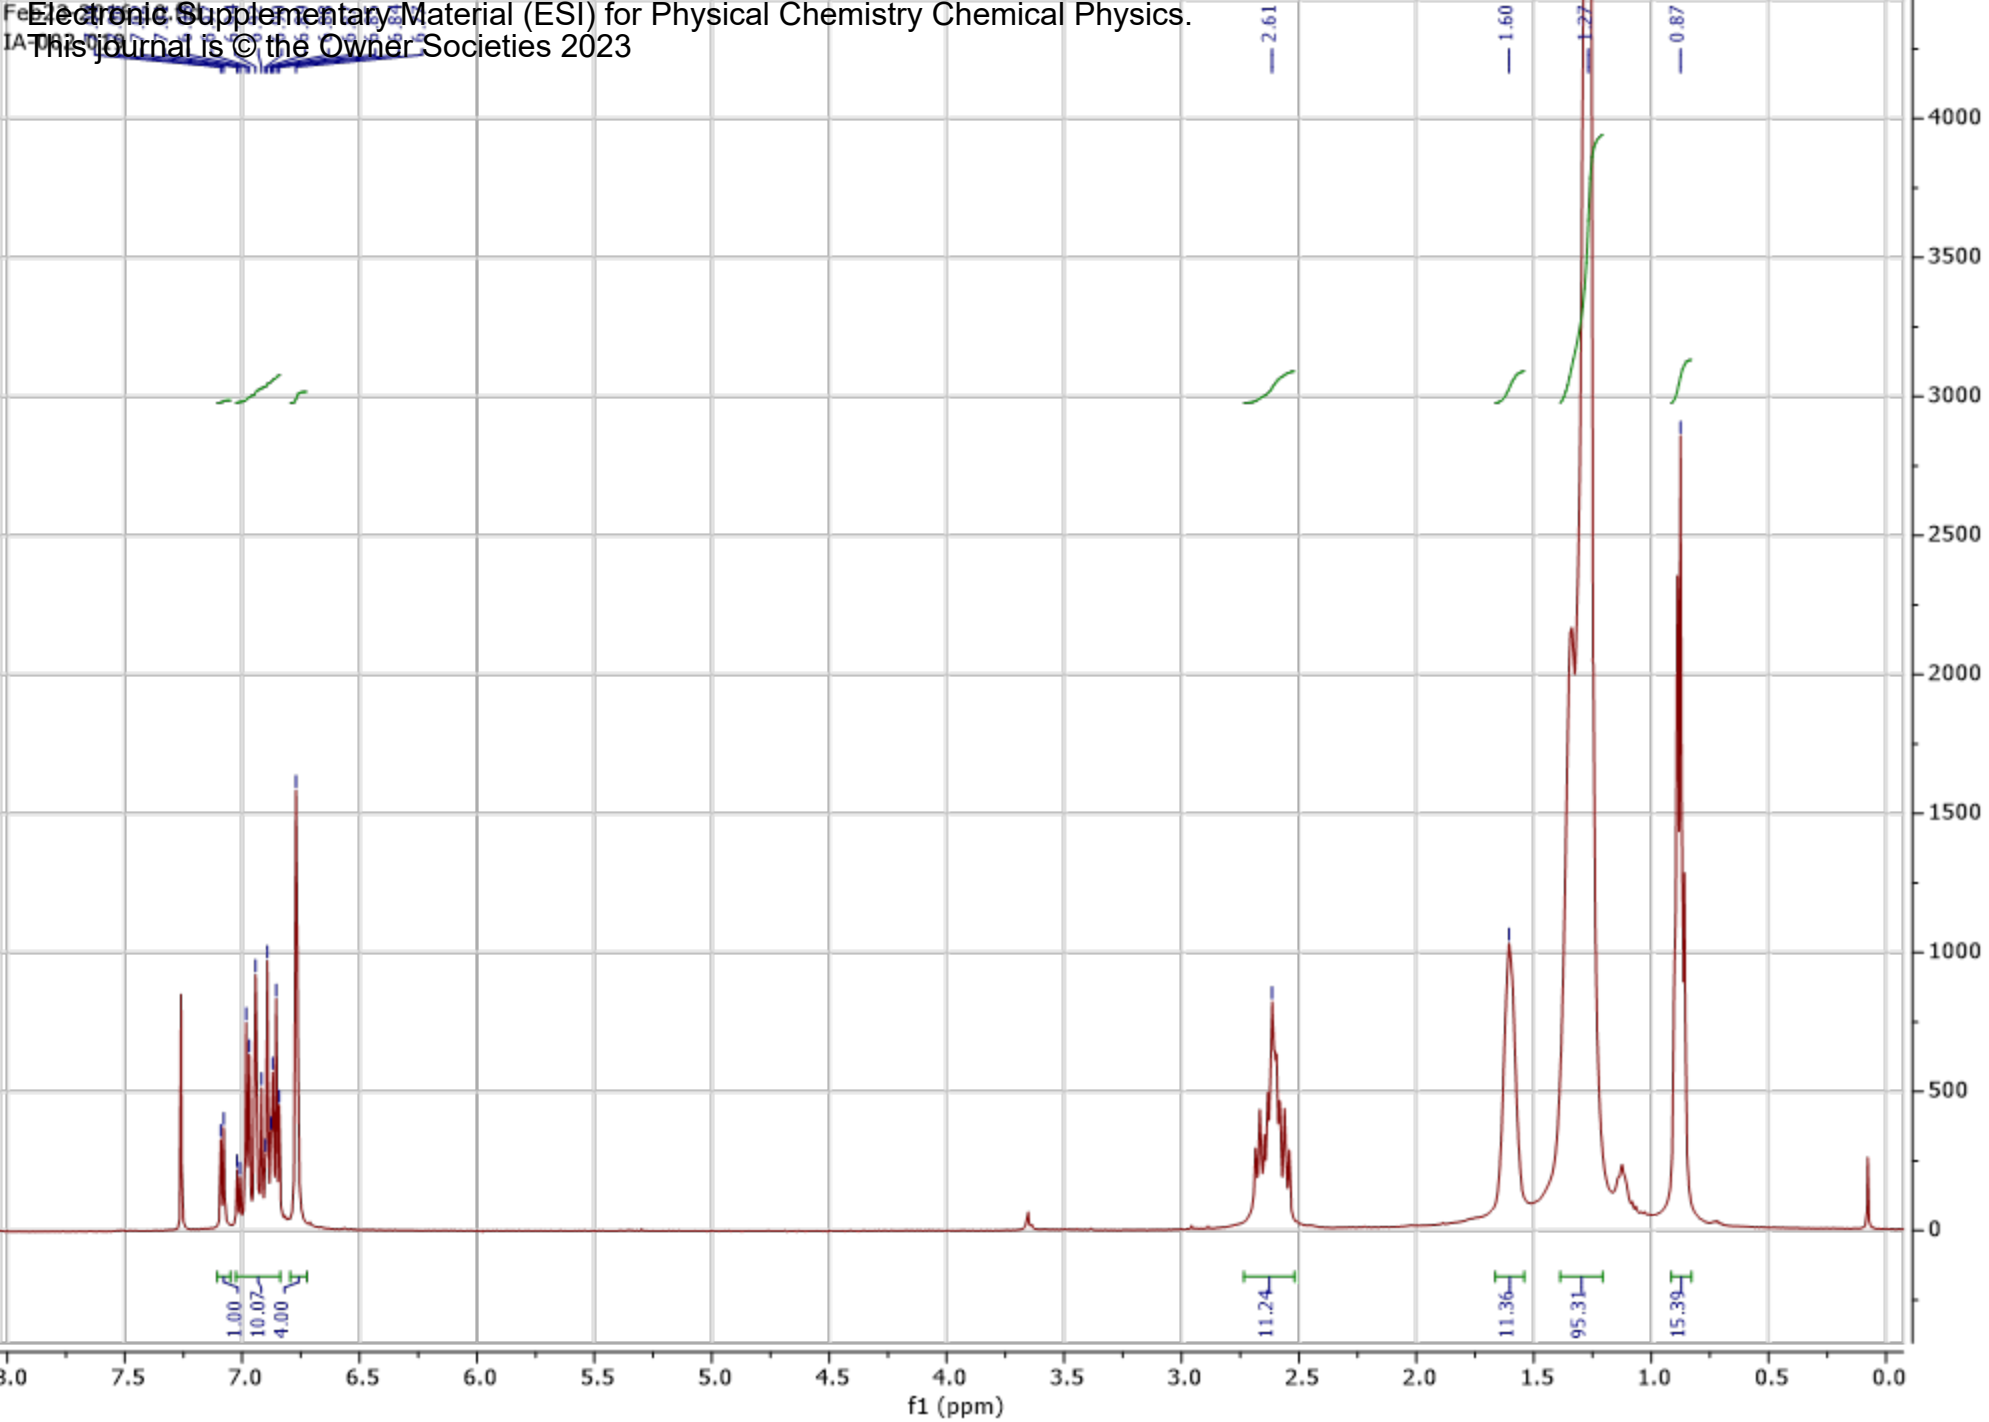

Supplement: d3cp00362k4.pdf [file d3cp00362k4.pdf]

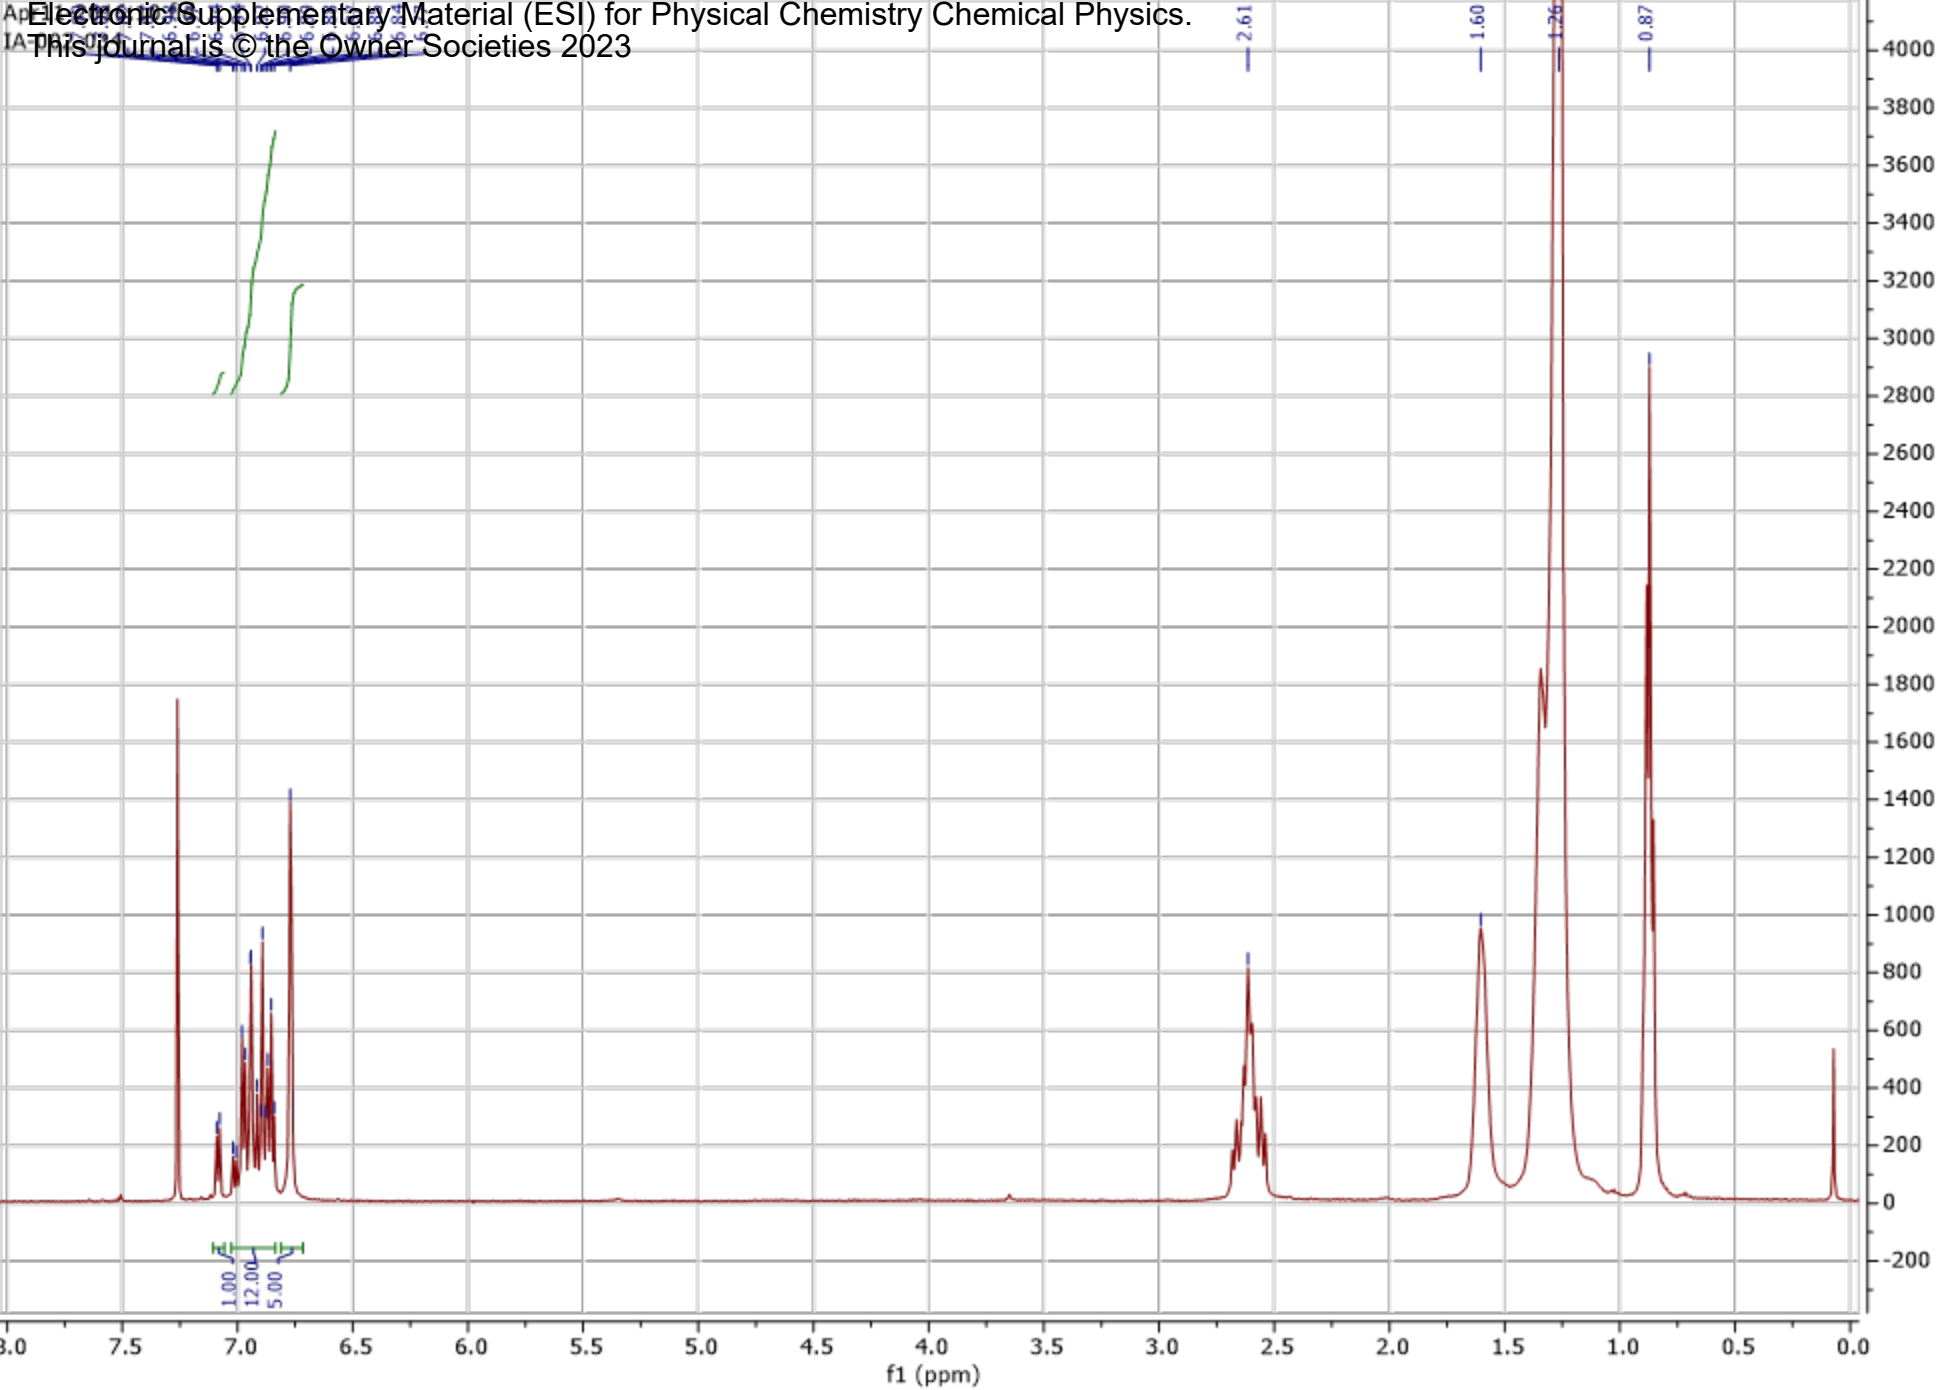

Supplement: d3cp00362k5.pdf [file d3cp00362k5.pdf]

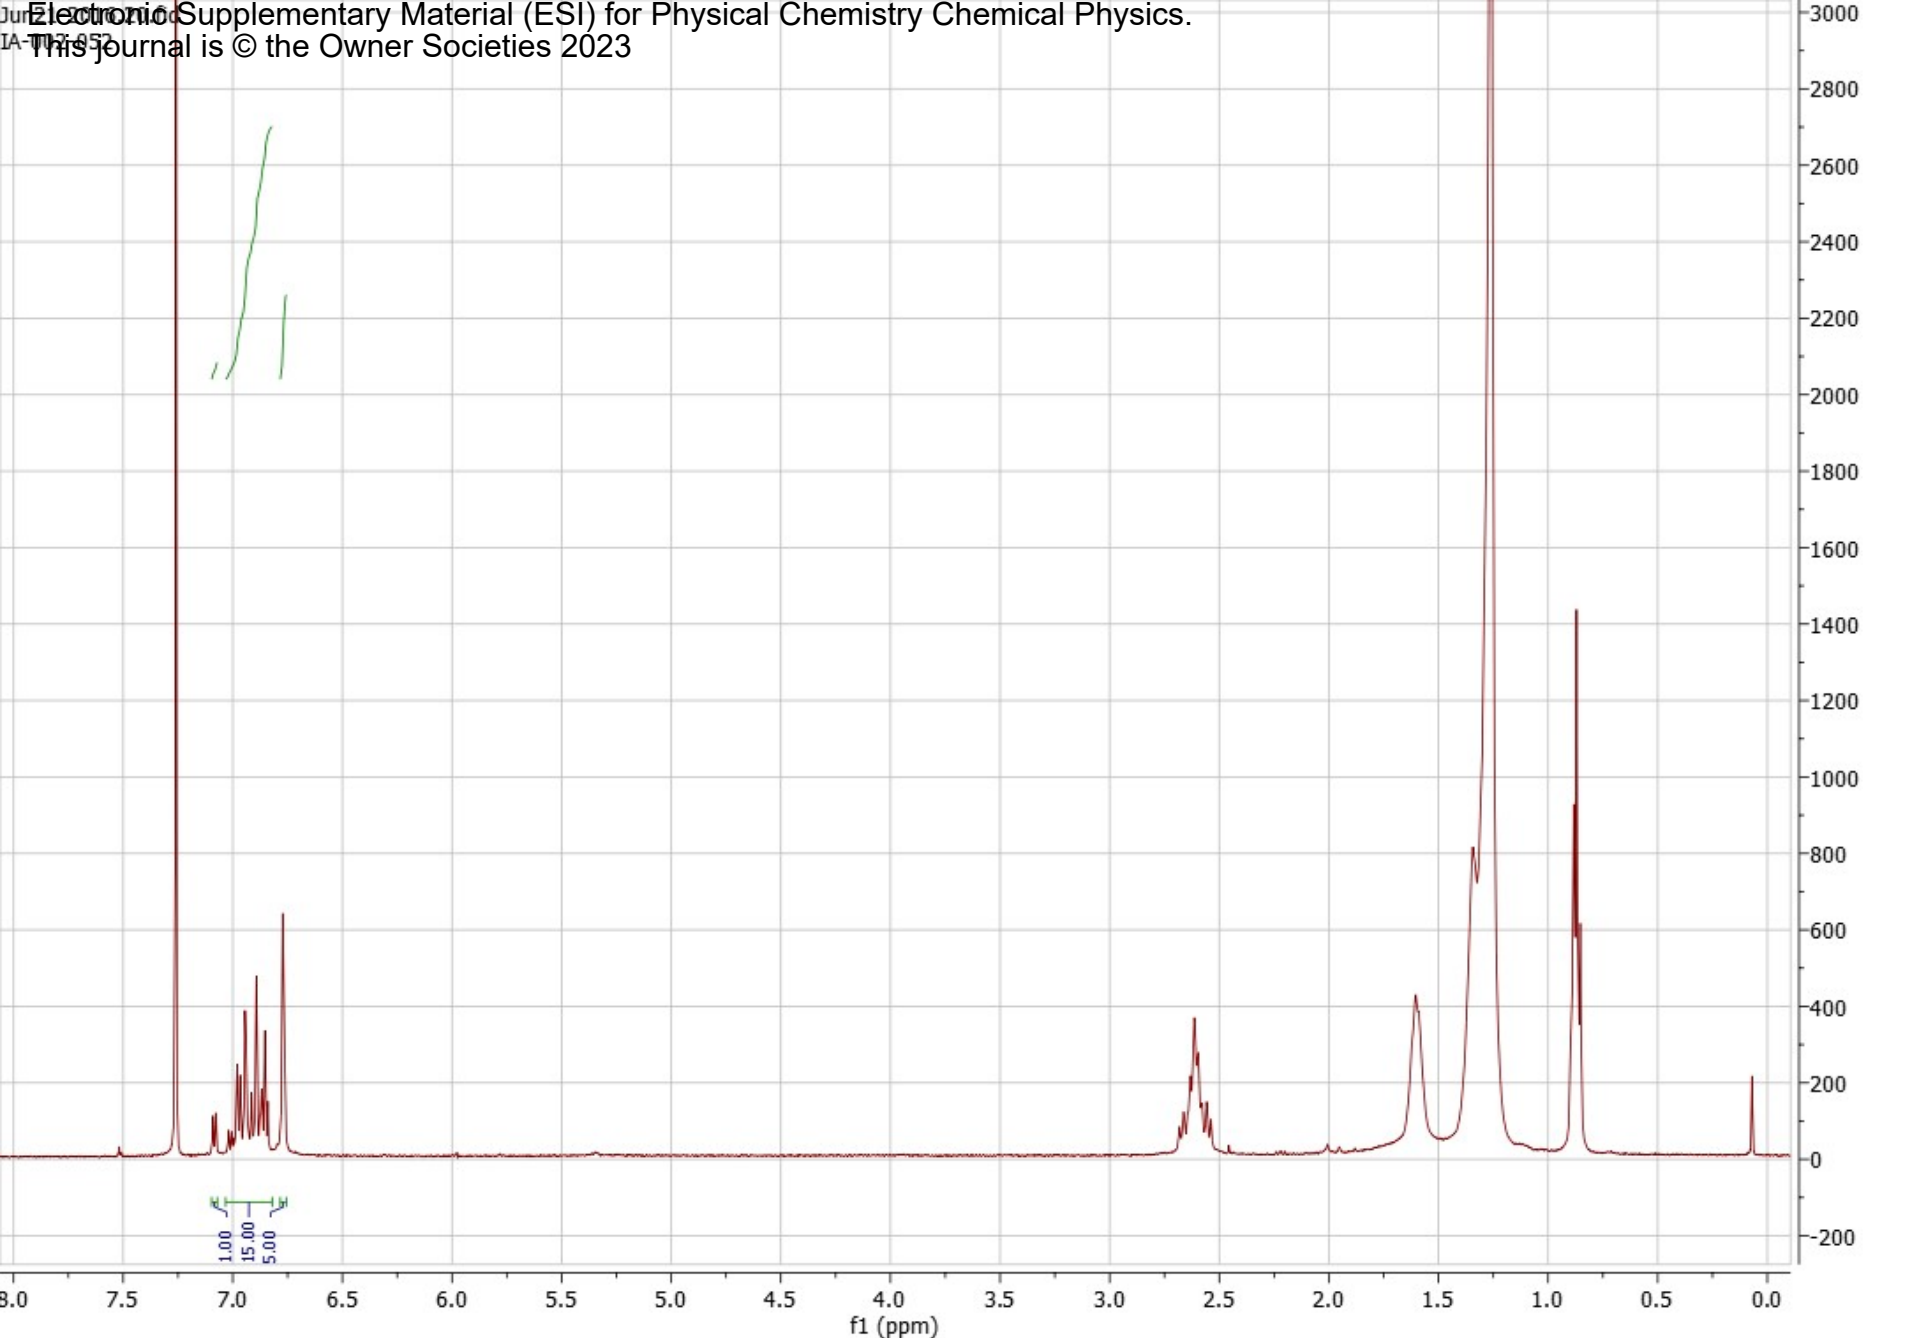

Supplement: d3cp00362k6.pdf [file d3cp00362k6.pdf]

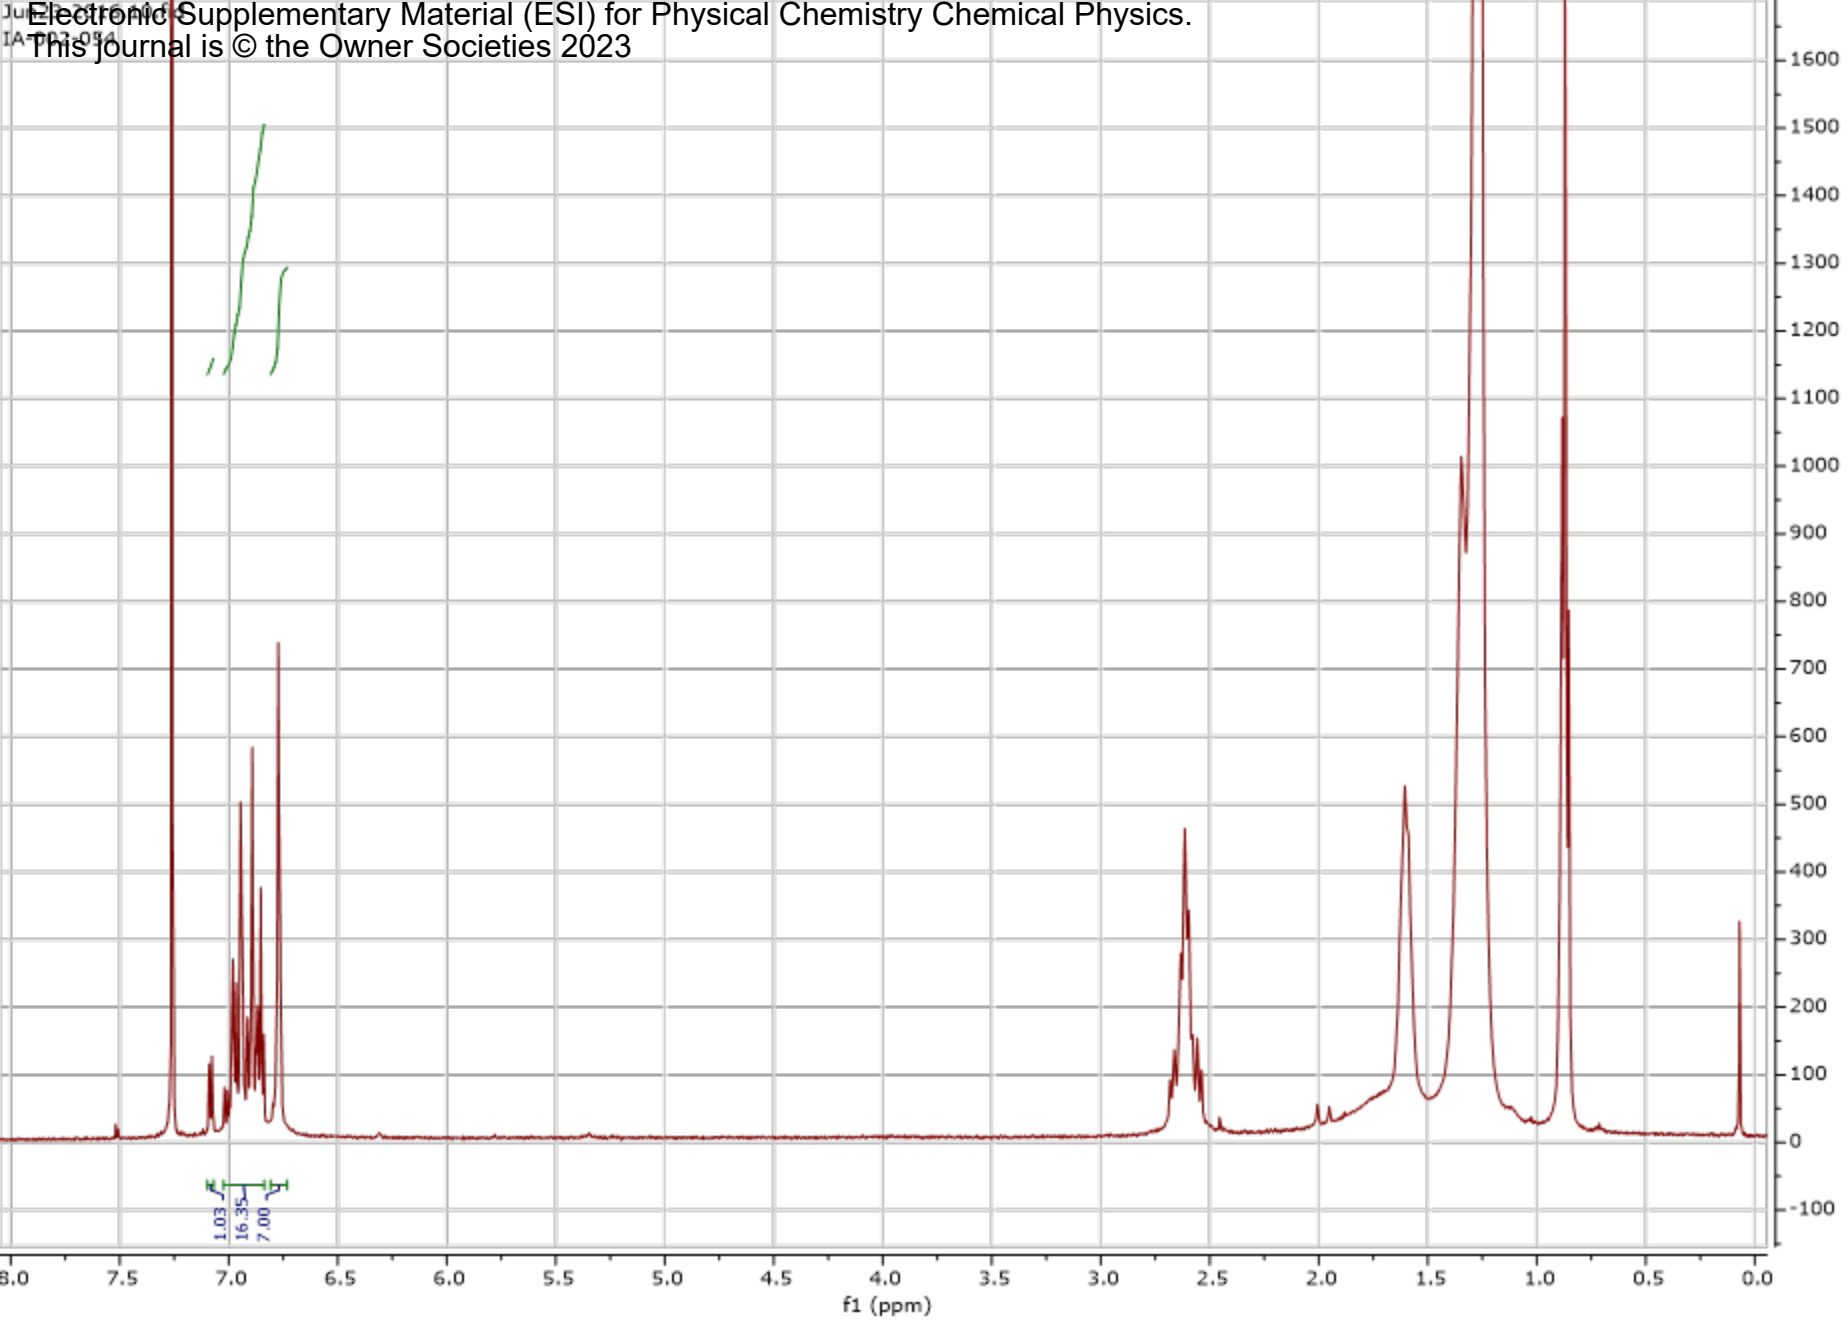

Supplement: d3cp00362k7.pdf [file d3cp00362k7.pdf]

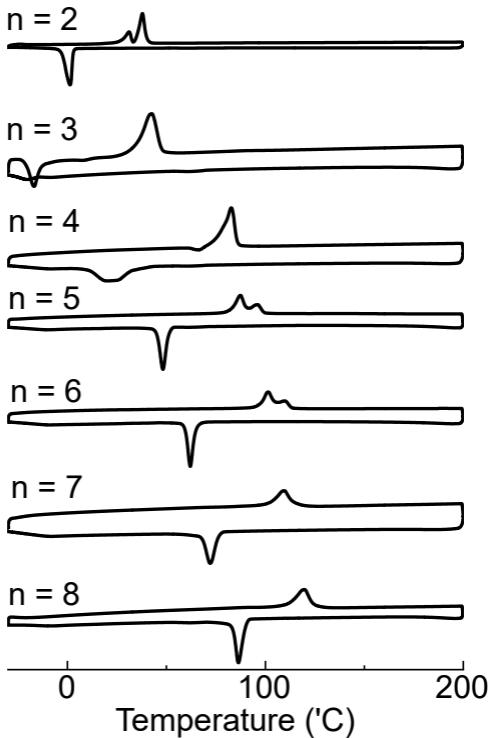

Supplement: d3cp00362k8.pdf [file d3cp00362k8.pdf]

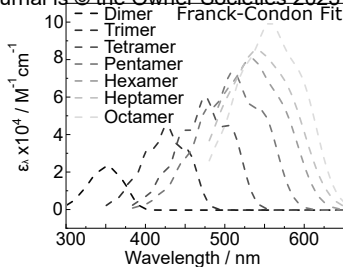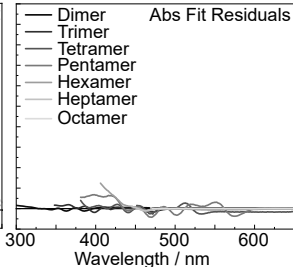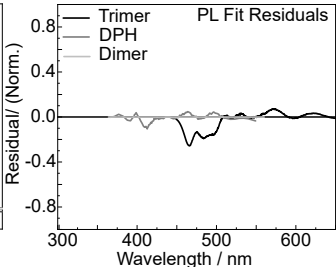

Supplement: d3cp00362k9.pdf [file d3cp00362k9.pdf]
